# Supplementary material for: Anti-Obesity and Anti-Inflammatory Effects of Novel Carvacrol Derivatives on 3T3-L1 and WJ-MSCs Cells
Source: MDPI journal article supplement (doi:10.3390/ph16030340), 2023-02-22
Supplement: s1 [file s1]

## HPLC CHROMATOGRAMS

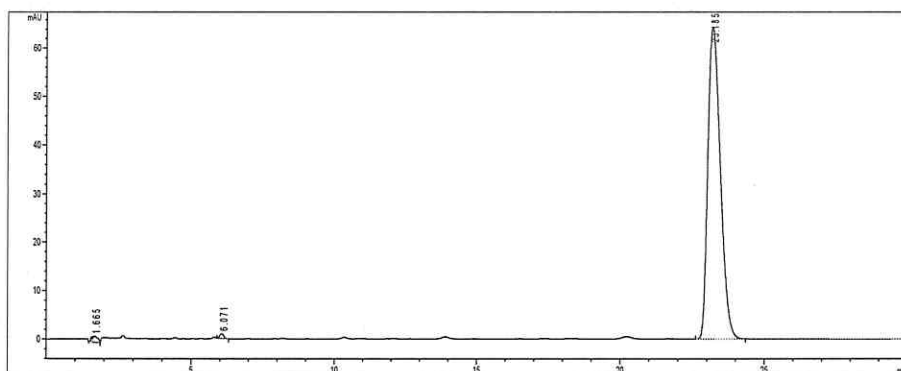

| Compound | Retention time | Area% |
|----------|----------------|-------|
| CD1      | 23.19          | >98   |

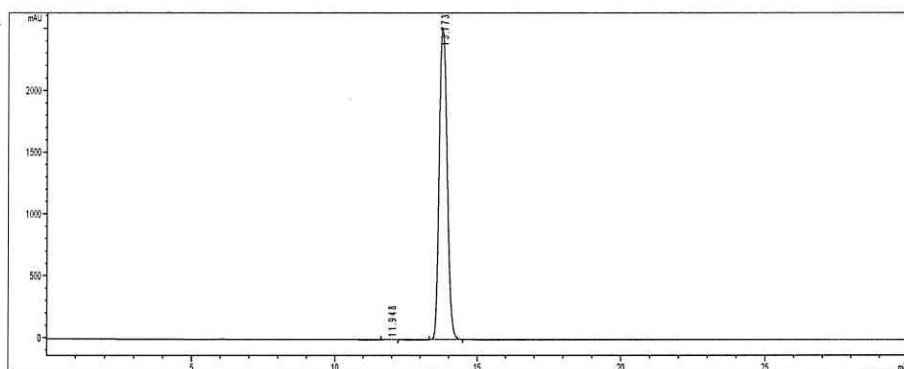

| Compound | Retention time | Area% |
|----------|----------------|-------|
| CD2      | 13.77          | >99   |

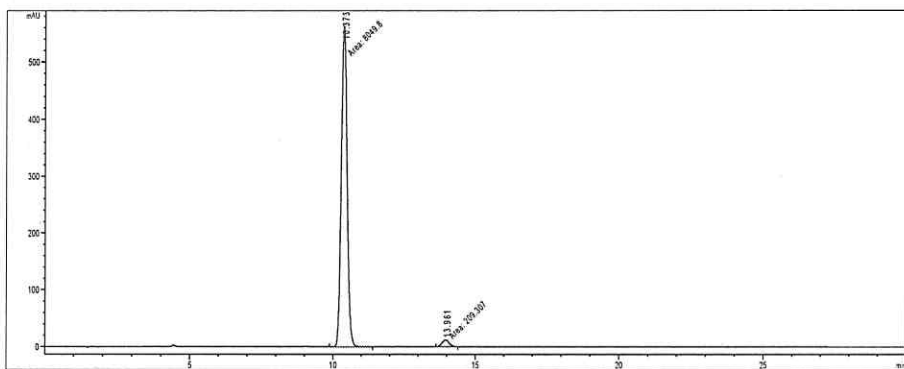

| Compound | Retention time | Area% |
|----------|----------------|-------|
| CD3      | 10.40          | >97   |

Sample Name: Ibu-car\_fraz\_27-36  
 Data Collected on: m300-mercury300  
 Archive directory: /home/caccia/vnmrsys/data  
 Sample directory: OLP-NA\_MARI1\_20211021\_01  
 FIDFile: PROTON

Pulse Sequence: PROTON (s2pul)  
 Solvent: cdcl3  
 Data collected on: Feb 17 2022

Operator: caccia

Relax. delay 1.000 sec  
 Pulse 45.0 degrees  
 Acq. time 1.706 sec  
 Width 4803.1 Hz  
 32 repetitions  
 OBSERVE H1, 300.1976543 MHz  
 DATA PROCESSING  
 FT size 16384  
 Total time 1 min 29 sec

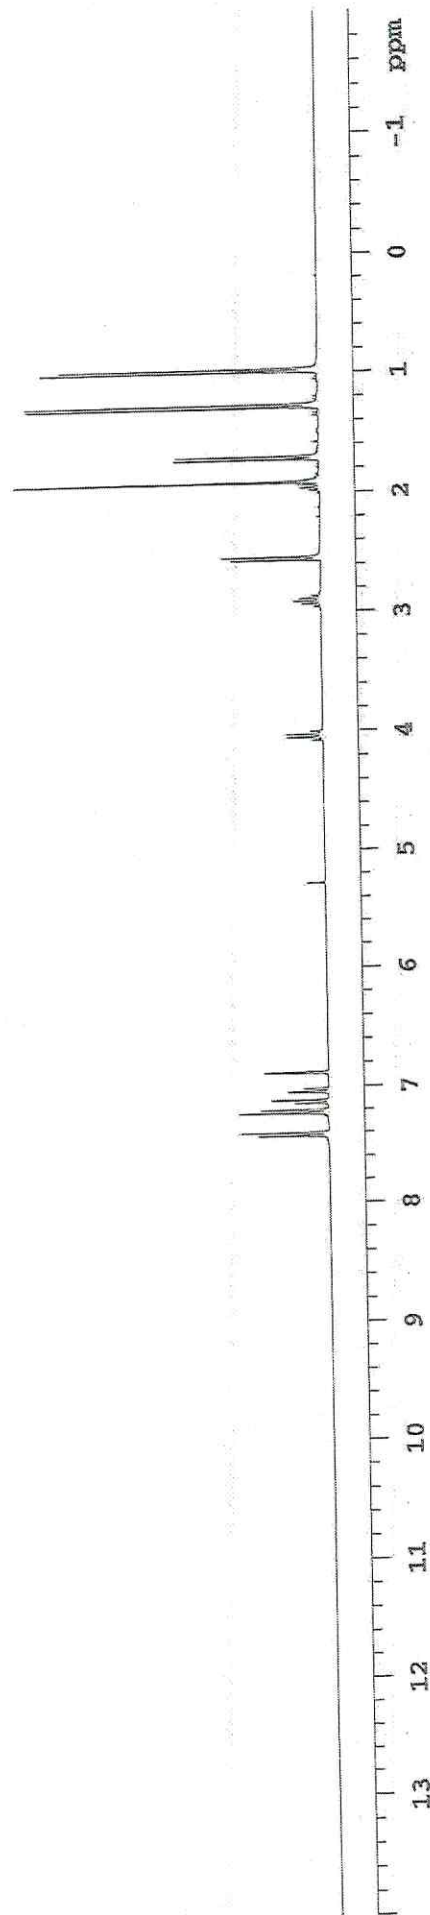

Sample Name:  
Ibu-car\_fraz\_27-36  
Data Collected on:  
m300-mercury300  
Archive directory:  
/home/caccia/vnmrsws/data  
Sample directory:  
OLP-RA\_MARI\_20211021\_01  
Fidfile: CARBON

Pulse Sequence: CARBON (s2pul)  
Solvent: cdcl3  
Data collected on: Feb 16 2022

Operator: caccia

Relax. delay 1.000 sec  
Pulse 45.0 degrees  
Acq. time 0.868 sec  
Width 18867.9 Hz  
2000 repetitions  
OBSERVE C13, 75.4847602 MHz  
DECOUPLE H1, 300.1991980 MHz  
Power 38 dB  
continuously on  
WALTZ-16 modulated  
DATA PROCESSING  
Line broadening 0.5 Hz  
Ft size 32768  
Total time 1 hr, 4 min

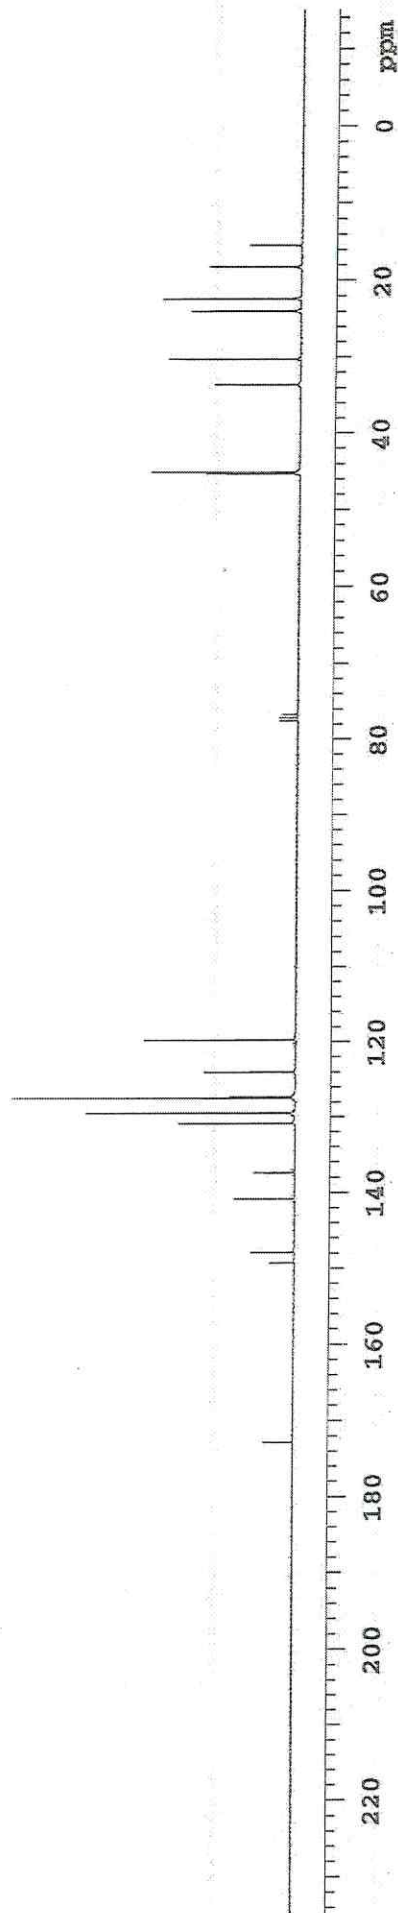

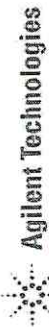

Sample Name:  
Flu-car\_fraz\_39-71  
Data Collected on:  
m300-mercury300  
Archive directory:  
/home/caccia/vmrays/data  
Sample directory:  
OLP-RA\_MARI1\_20211021\_01  
FidFile: PROTON

Pulse Sequence: PROTON (s2pul)  
Solvent: cdcl3  
Data collected on: Feb 15 2022

Operator: caccia

Relax. delay 1.000 sec  
Pulse 45.0 degrees  
Acq. time 1.706 sec  
Width 4803.1 Hz  
32 repetitions  
OBSERVE H1, 300.1976543 MHz  
DATA PROCESSING  
Ft size 16384  
Total time 1 min 29 sec

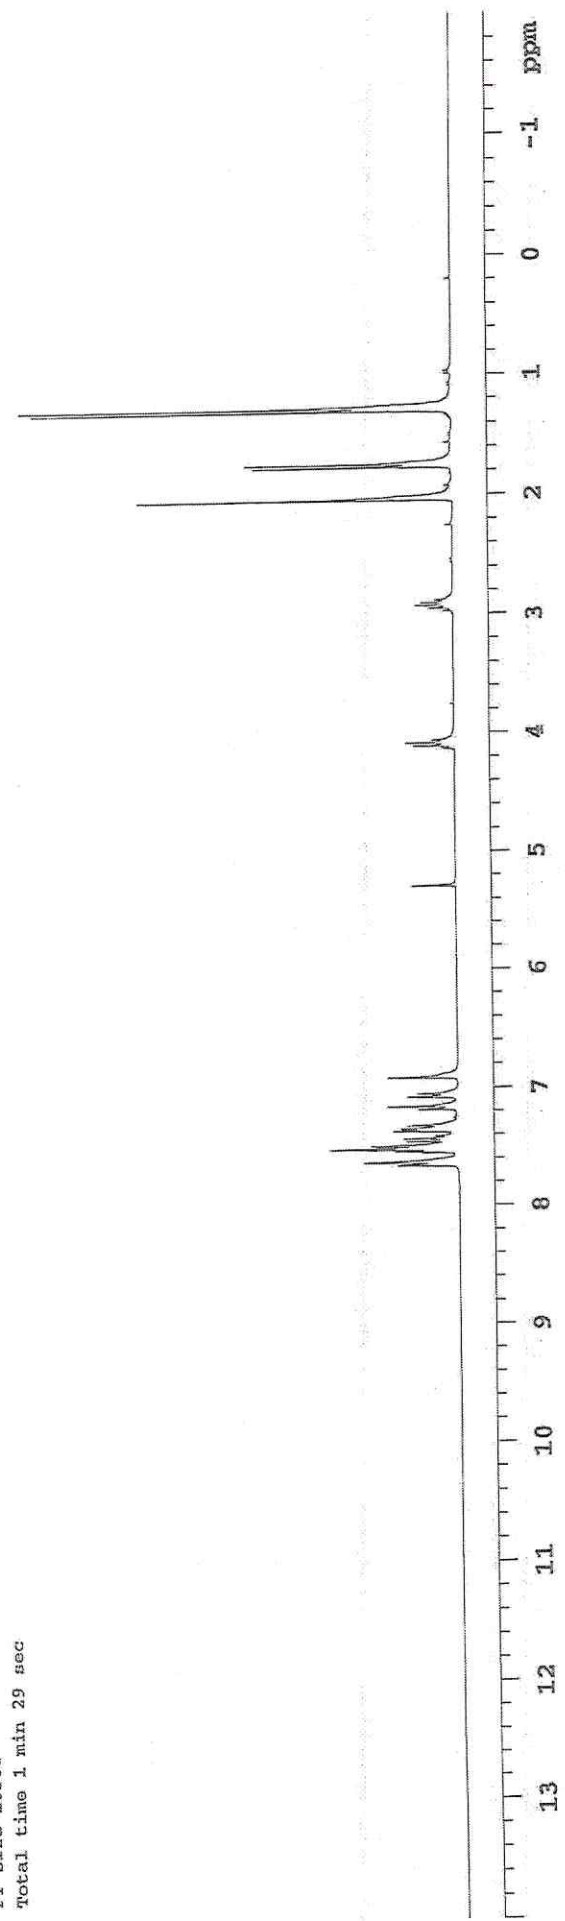

Sample Name:  
Flur-car\_fraz\_39-71  
Data Collected on:  
m300-mercury300  
Archive directory:  
/home/caccia/vnmrSYS/data  
Sample directory:  
OLP-RA\_MAR11\_20211021\_01  
FidFile: CARBON

Pulse Sequence: CARBON (s2pul)  
Solvent: cdcl3  
Data collected on: Feb 16 2022

Operator: caccia

Relax. delay 1.000 sec  
Pulse 45.0 degrees  
Acq. time 0.868 sec  
Width 18867.9 Hz  
2000 repetitions  
OBSERVE C13, 75.4847602 MHz  
DECOUPLE H1, 300.1991980 MHz  
Power 38 dB  
continuously on  
WALTZ-16 modulated  
DATA PROCESSING  
Line broadening 0.5 Hz  
FT size 32768  
Total time 1 hr, 4 min

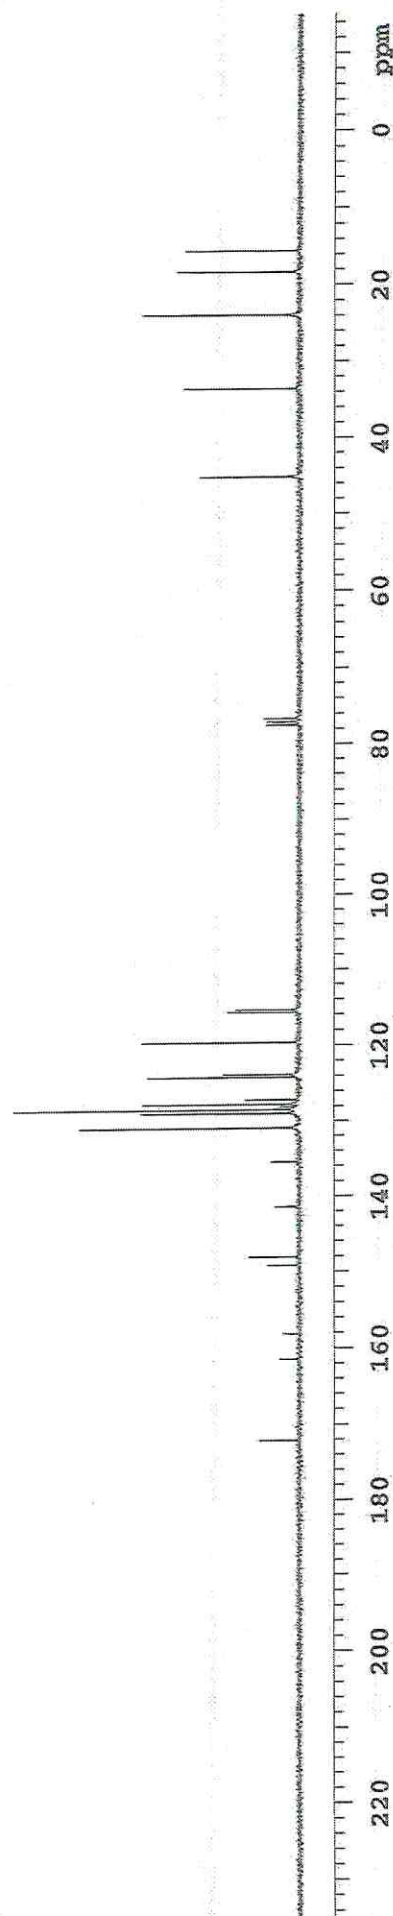

Sample Name:  
Naprox-CAR  
Data Collected on:  
m300-mercury300  
Archive directory:  
/home/caccia/vnmrsys/data  
Sample directory:  
OLP-RA\_MARI1\_20211021\_01  
Fidfile: PROTON

Pulse Sequence: PROTON (s2pul)  
Solvent: cdcl3  
Data collected on: Feb 15 2022

Operator: caccia

Relax. delay 1.000 sec  
Pulse 45.0 degrees  
Acq. time 1.706 sec  
Width 4803.1 Hz  
32 repetitions  
OBSERVE H1, 300.1976543 MHz  
DATA PROCESSING  
Ft size 16384  
Total time 1 min 29 sec

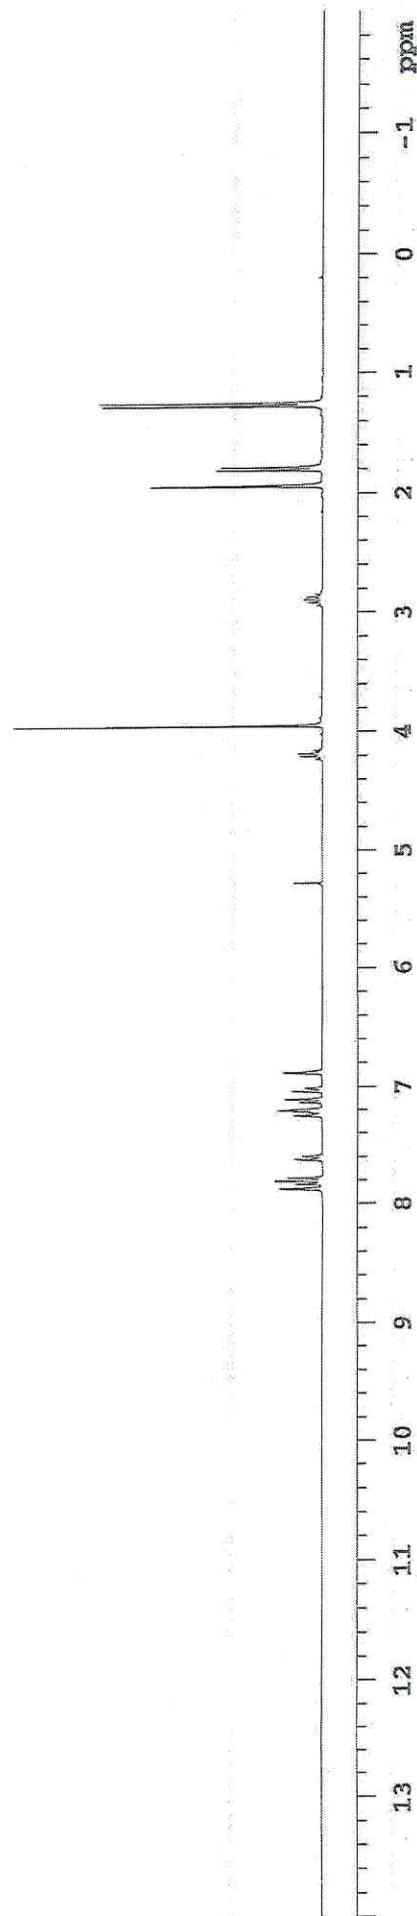

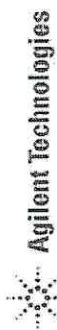

Sample Name:  
Naprox-CAR  
Data Collected on:  
m300-mercury300  
Archive directory:  
/home/caccia/vnmrsws/data  
Sample directory:  
OLP-RA\_MARI1\_20211021\_01  
FidFile: CARBON  
Pulse Sequence: CARBON (s2pul)  
Solvent: cdcl3  
Data collected on: Feb 15 2022

Operator: caccia

Relax. delay 1.000 sec  
Pulse 45.0 degrees  
Acq. time 0.868 sec  
Width 18867.9 Hz  
1664 repetitions  
OBSERVE C13, 75.4847602 MHz  
DECOUPLE H1, 300.1991980 MHz  
Power 38 dB  
continuously on  
WALTZ-16 modulated  
DATA PROCESSING  
Line broadening 0.5 Hz  
FT size 32768  
Total time 1 hr, 4 min

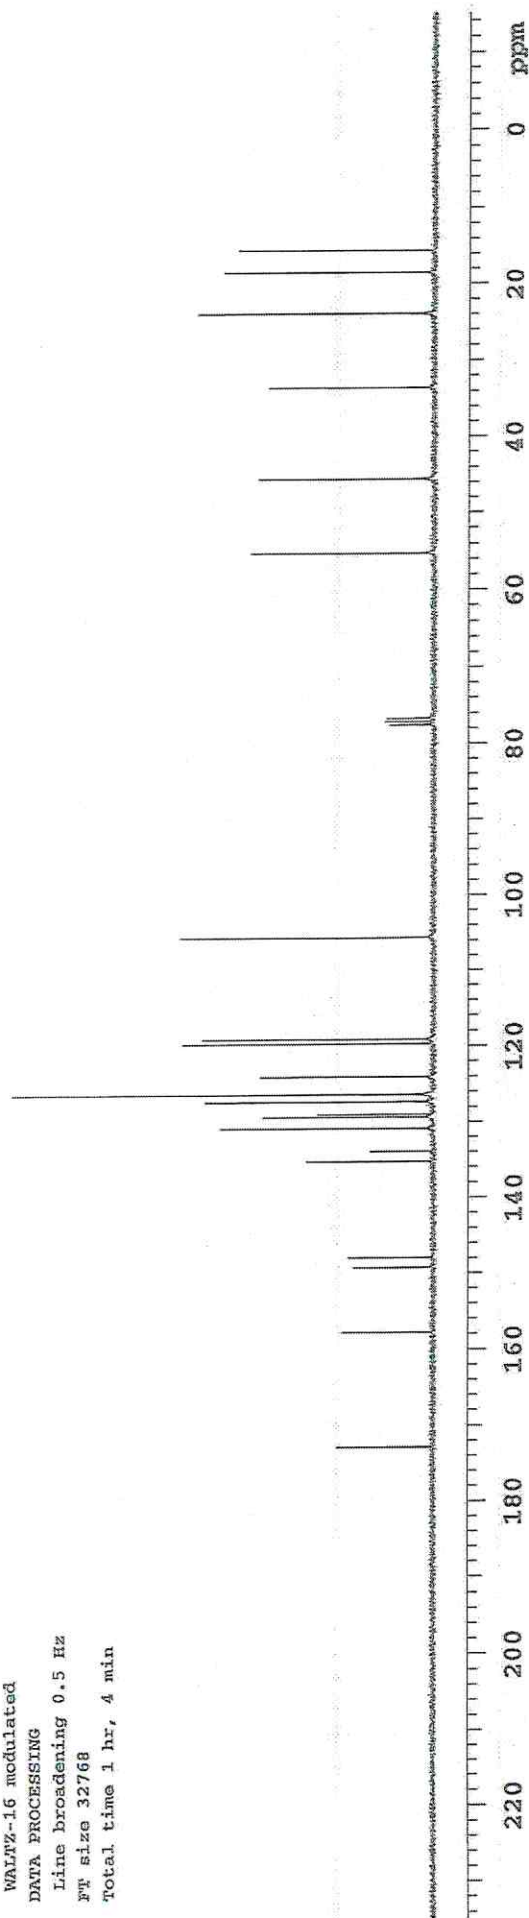

## HR-MS SPECTRA

### High Resolution Mass Spectrometry Analysis

10 µg/mL of each investigated compound was dissolved in ACN/H<sub>2</sub>O 80/20 with 0.1% of formic acid and injected into the mass spectrometer through a syringe pump at a flow rate of 5 µL/min. The mass spectrometer was a Thermo Fischer Orbitrap Fusion™ Tribrid™ operating in MS scan in the m/z range of 80 to 500 m/z by using the Orbitrap as detector type at 240,000 of mass resolution (FWHM). All compounds were acquired in positive ion mode.

#### CD1

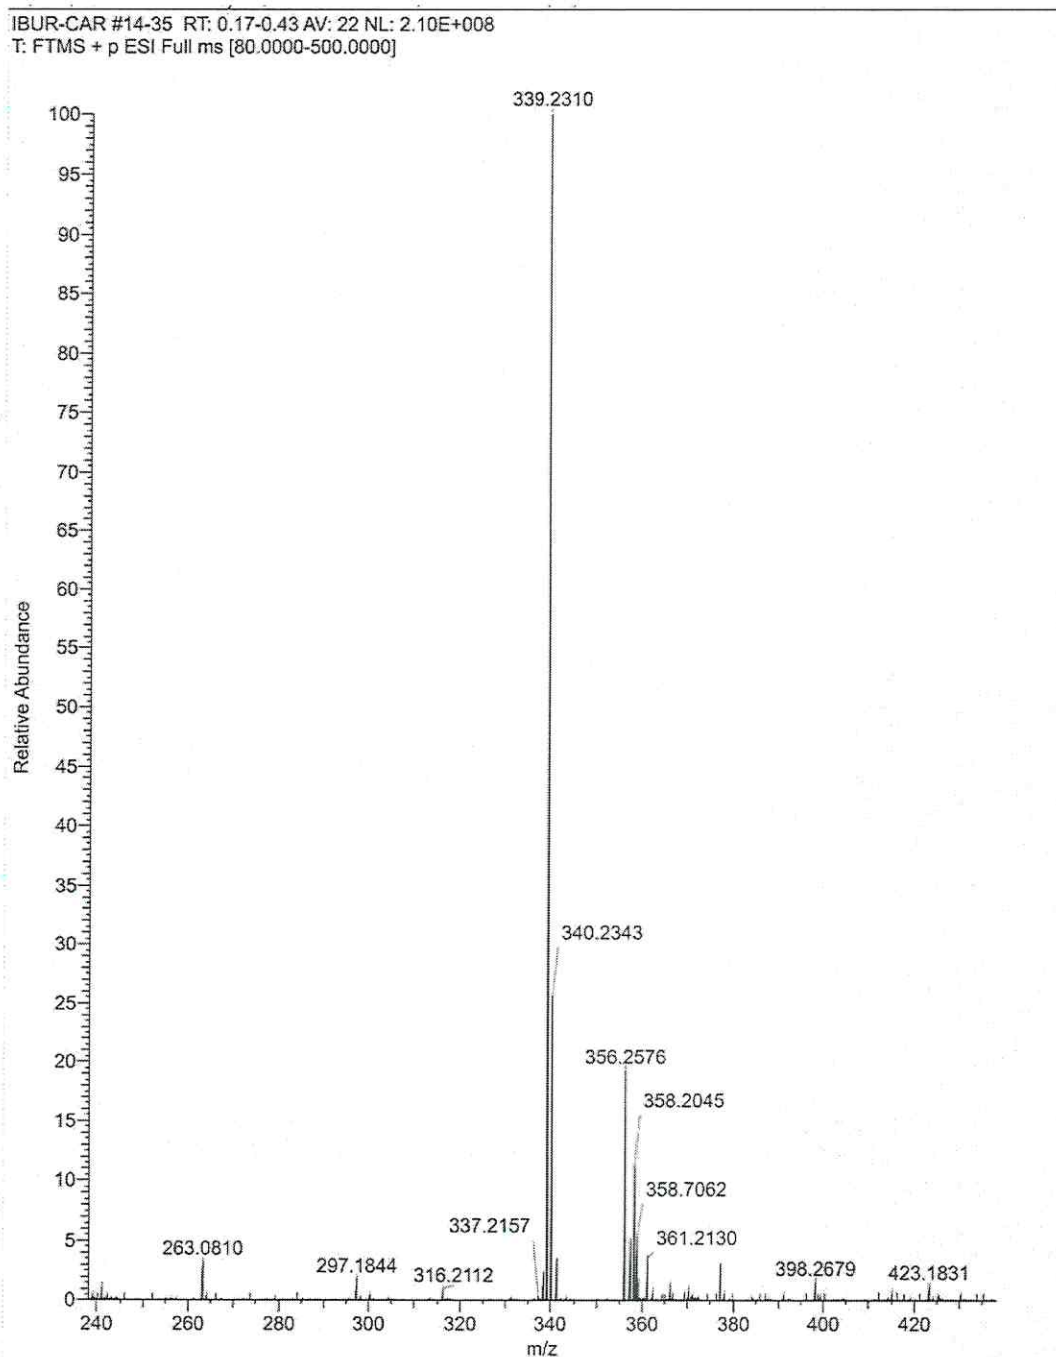



CD2

FLUR-CAR\_240resolution #14-35 RT: 0.17-0.43 AV: 22 NL: 1.76E+008  
T: FTMS + p ESI Full ms [80.0000-500.0000]

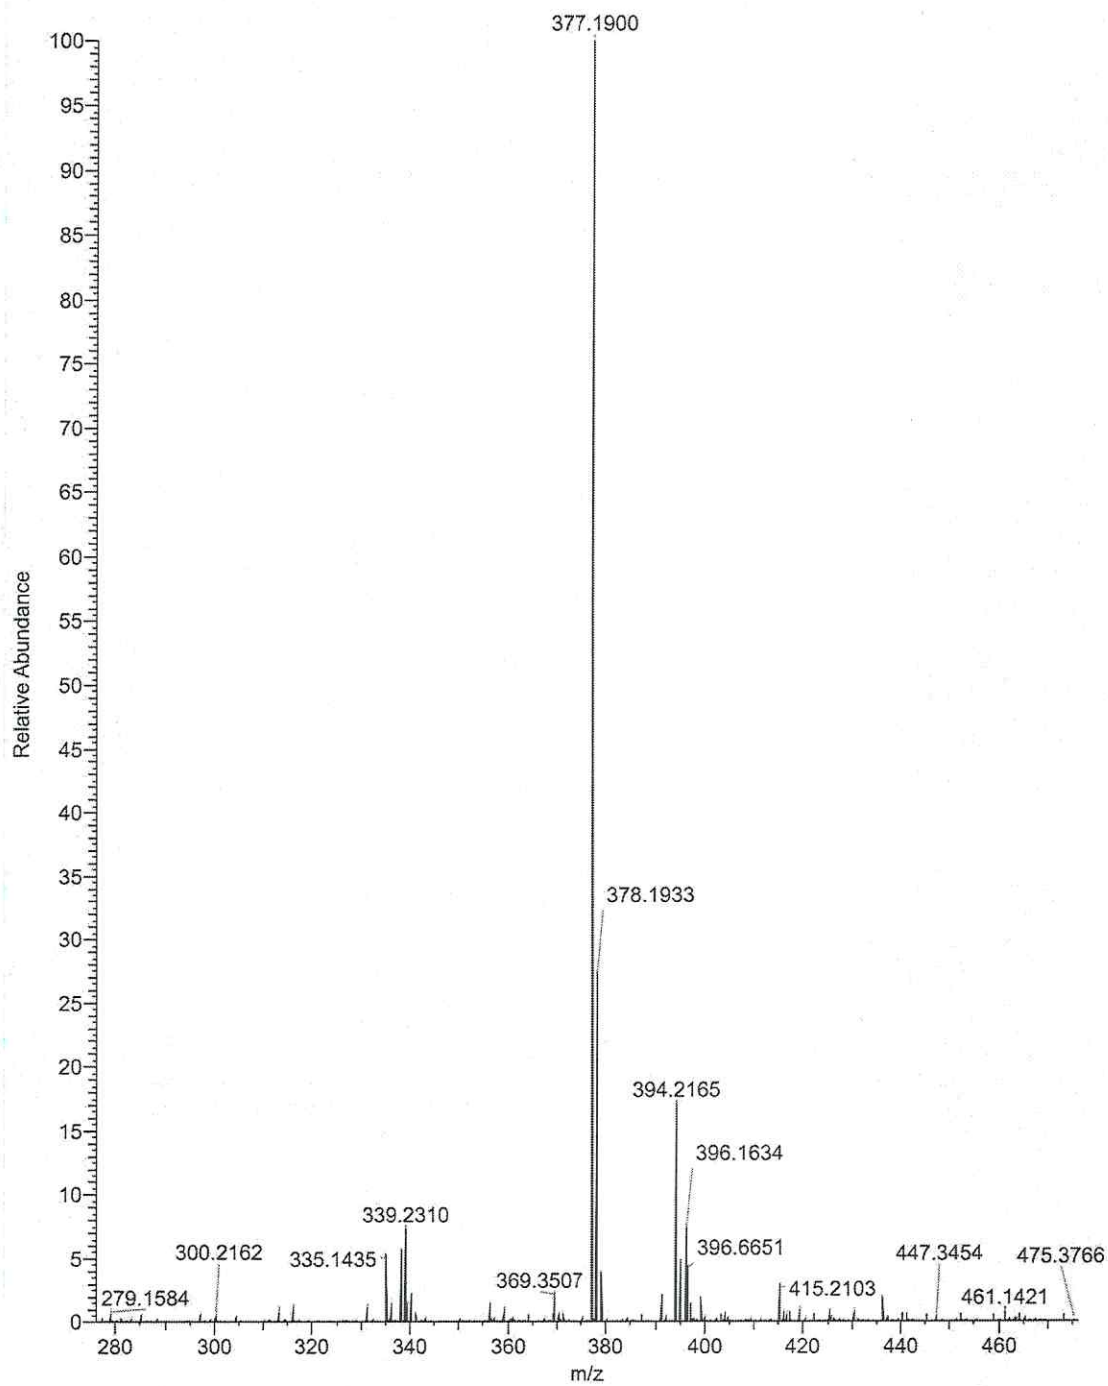

CD3

NAPROX-CAR #16-42 RT: 0.19-0.51 AV: 27 NL: 2.29E+008  
T: FTMS + p ESI Full ms [80.0000-500.0000]

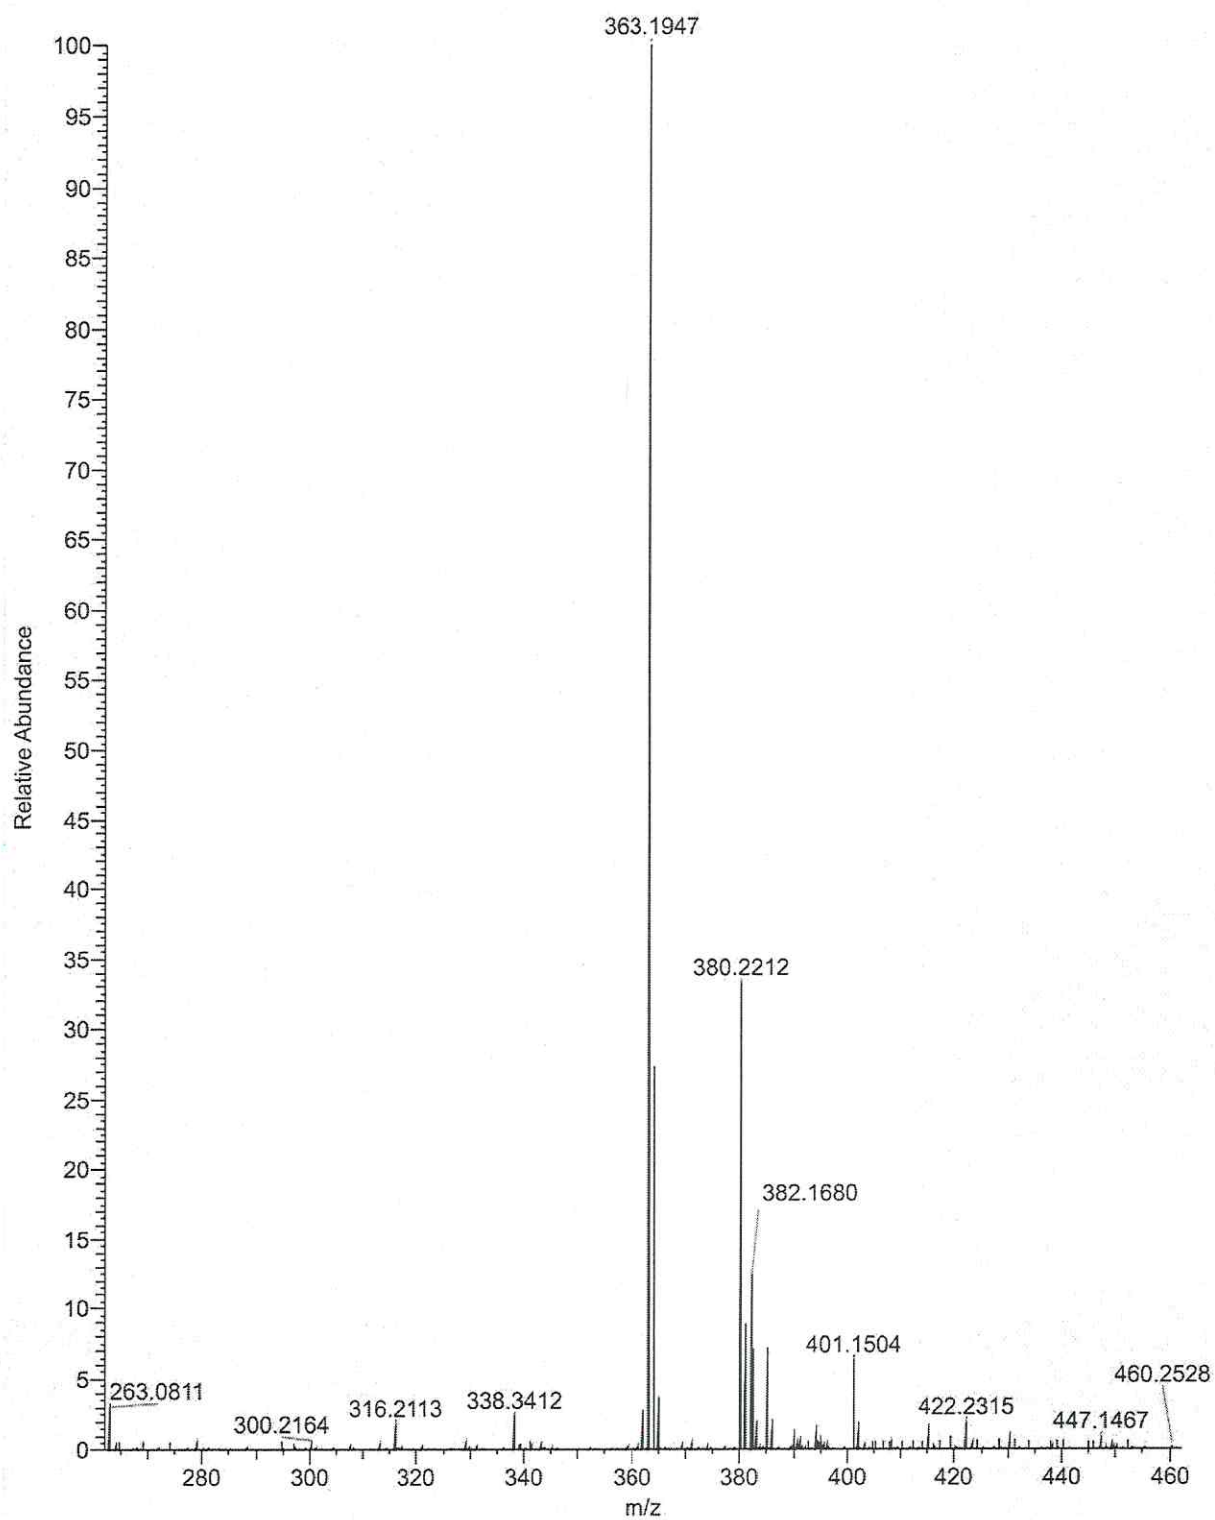

## Additional biological data

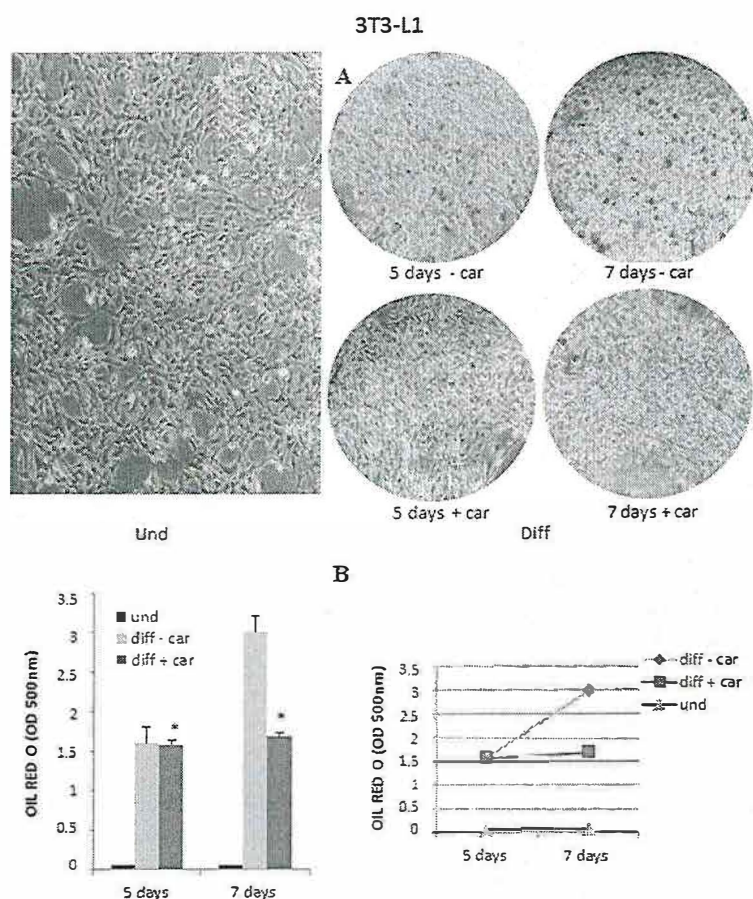

**Figure S1. Reduction of adipocyte differentiation by car in 3T3-L1 cells.** 3T3-L1 preadipocytes were grown in adipogenic differentiation medium until total differentiation (7 days) and treated with 25  $\mu$ M car. The visualization of triglyceride accumulation was conducted by Oil Red O staining (A). Lipid accumulation was measured through a spectrophotometer at 5 and 7 days of differentiation (B). Und = Undifferentiated cells; Diff = Differentiated cells without (diff - car) or with car (diff + car). Data are presented as mean  $\pm$  SD ( $n = 3$ ). \* $p < 0.05$ : treated cells vs control (diff - car) and car (diff + car).

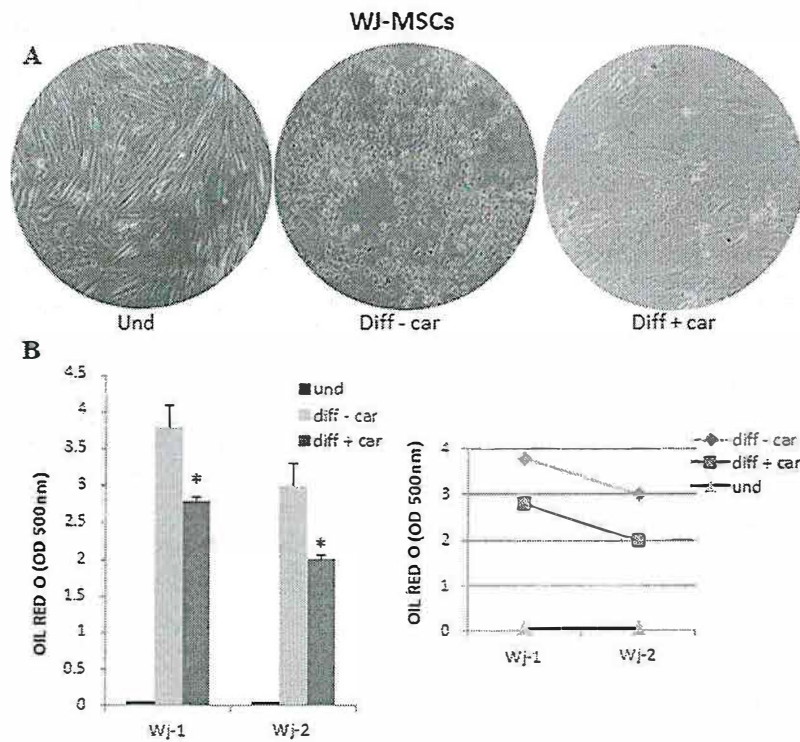

**Figure S2. Reduction of adipocyte differentiation by car in WJ-MSCs cells.** Two subcultures of Wharton's jelly WJ-MSCs, WJ-1, and WJ-2, were grown in an adipogenic differentiation medium until total differentiation (17 days) and treated with 25  $\mu$ M car. The visualization of triglyceride accumulation was conducted by Oil Red O staining. Lipid accumulation was measured through a spectrophotometer. Und = Undifferentiated cells; Diff = Differentiated cells without (diff - car) or with car (diff + car). Data are presented as mean  $\pm$  SD ( $n = 3$ ). \* $p < 0.05$ : treated cells vs control (diff - car) and car (diff + car).
